# Supplementary material
Source: PubMed Central journal article supplement (PMC1283792)
Supplement: pnas_0501858102_2.pdf [file pnas_0501858102_2.pdf]

Pf MKYPNFFILKVFFLFFYLSEFEDIYYHCINIGKPQVNTNGKVNNSNEKANLSTEWS  
Pr MKYLNFFILKVFFLFFYLSEFEDIYYHCINIGKPQINTNGKVNNSNEKANLSTEWS  
Pg MKDFKMSKLNIIYVFLIYLSEFQNI-YKCIKIGKQQNKVHNNNRLESKFDNLSKWS  
Pk MKNVAFSILHIISSLFILIYLSQSGLYSCKNTGKTASKGNHNSPNASVNSNSLSTEWS  
Pv MKNFAPPILNIISSLFILIYLSQSGLYNCMNTGKTASAKRSNENSGVNDNSLSTEWS  
Py MKRINIPTSTIGCLLLFLLSSQNAQYECMNIKGSNNASGDKTNFVQDGLKNTKWS  
Pb MKCINIPTSTIGCLLLFLLSSQNAQYECMNIKGSNNNGSGKANFNVDGKLNKTKWS  
Pc MKRINIPTSAIGCLLLFLLSSQNAQYECMNIKGSNNNGSENKANLNAQNGKLNKTKWS  
Cons \*\* : : : : \* \* . \* \* : . : . : . \* . : \*

Pf NRGFNFMDDLKNGYLQSHGNLEEVKDELANELANKIQNKIGEYLKDEKNLSVLQHLQ  
Pr NRGFNFMDDLKNGYLQSHGNLEEVKDELANELANKIQNKIGEYLKDEKNLSVLQHLQ  
Pg NKGYNFMDDLKNGYLKKNKGNLDDVKNLADLANKIQNKIEDYLKEENMGMDIENFT  
Pk EKGYNFMDLVKNGYLKKNKGNLDDVKNLADLDELAKIKDKLNGILKDENIFYDLENMD  
Pv EKGYNFMDLVKNGYLKKNKGNLDDVKNLADLDELASKIKDKLNGILKDEKIFYDLENMD  
Py DSGYSFMDLIKNGYVKNK-DLDDIKDDLASELATKIQNTVKNYIKEDN---DEDELN  
Pb DNGYSFMDLIKNGYVKNK-DLDDIKDDLASELATKIQNSISKYIKEDN---DEDELN  
Pc ETGYNFMDLIKNGYVKNK-DLDDIKDDLASELATKIQNTVSNYIKEDH---DEDEIN  
Cons : \* . \* \* \* : \* \* \* \* . . : \* : \* \* \* \* \* \* \* \* \* \* : \* : . .

Pf LEDLDDLKHYVKDVSEYIGAKAGDLLDENLESTLKP LLERKS FETFEQALHNKSTDN  
Pr LEDLDDLKHYVKDVSEYIGAKAGDLLDQNLNTLKP LLERKS FETFEQALHNKNTDN  
Pg DEDLNDLKIYVKDISEYVGLKAADLLDKNLEELKPIILTKKAFDSFENNLNKNIIDD  
Pk EEDISDFKNYLKDMSEYIGLKAADILNSNLEESLKSFLPKGSFANLKEAMGSSSPVN  
Pv DQDKDLKKNYLKDMSEYIGLKAADILNSNIEESLKP LLSNSFASLKEAMGSTSAVD  
Py DEDIKNLKIYVKEISGYVGLKAADLLDKNLENALKPLIENKS---ESKLSNEGTS  
Pb DDDIKNLKIYVKEISGYVGLKAADLLDKNLESALKPLIENKSFDKSEKLSNEGTS  
Pc DDDIKNLKIYVKDISEYVGLKAADLLDKNLENALKPIIENKSGDKPEKLSNEGTS  
Cons : \* . . \* \* \* : \* \* \* \* \* \* \* \* \* \* \* \* \* \* \* \* \* \* \* \* \* \* . . . .

Pf F-----  
Pr F-----  
Pg V-----  
Pk LNFDEDEGETK-----KGKSKKGYKKGYSNDENA--  
Pv LKIDDEDETKEEKAKEEKAKEVKAkakakakakkgdskkedskkgskdENAKD  
Py F-----  
Pb F-----  
Pc F-----  
Cons

Pf -----VPFEENKSGNANEETENFVDELVEDYKTKNPDLEEQ-----  
Pr -----VPFEENDKSGNANEETEFVDELVEEYENTKNPDLEEQ-----  
Pg -----EY-EENPNDENVNEETETFVNELVNDYENNQLDSDLQY-----  
Pk -----NDENANDEDVDETTEDFINELVDAYEEKHKKDLENY-----  
Pv ENAKDDNSSDGNSDDNDMDVDEATEDFINELVDVYEEENQKDLLEY-----  
Py -----RFNNEIIDDEDPEEEIDHFADELADYEYEVKQENLEQYENLDQYEN  
Pb -----RFNNEIIDDEDPEEEIDHFAADLTDKYEVKQENLEQY-----  
Pc -----RFNNEIIDDEDPEQEIDHFAADLTDYEYEVKQIENLEHY-----  
Cons : : . . : : : \* : \* \* \* \* \* \* \* \* \* \* . \* : .

Pf -----TKDIKTHSDSD  
Pr -----TKDIKTPSDSD  
Pg -----EKEIKTHNNLD  
Pk -----AQEIKNHNLD  
Pv -----AQEIKTHNNLD  
Py LDQYGNFDQYEKDINPHH---  
Pb -----EKDINPHH---  
Pc -----DQEINPHH---  
Cons : \* \* :
