# Supplementary material
Source: PubMed Central journal article supplement (PMC1283792)

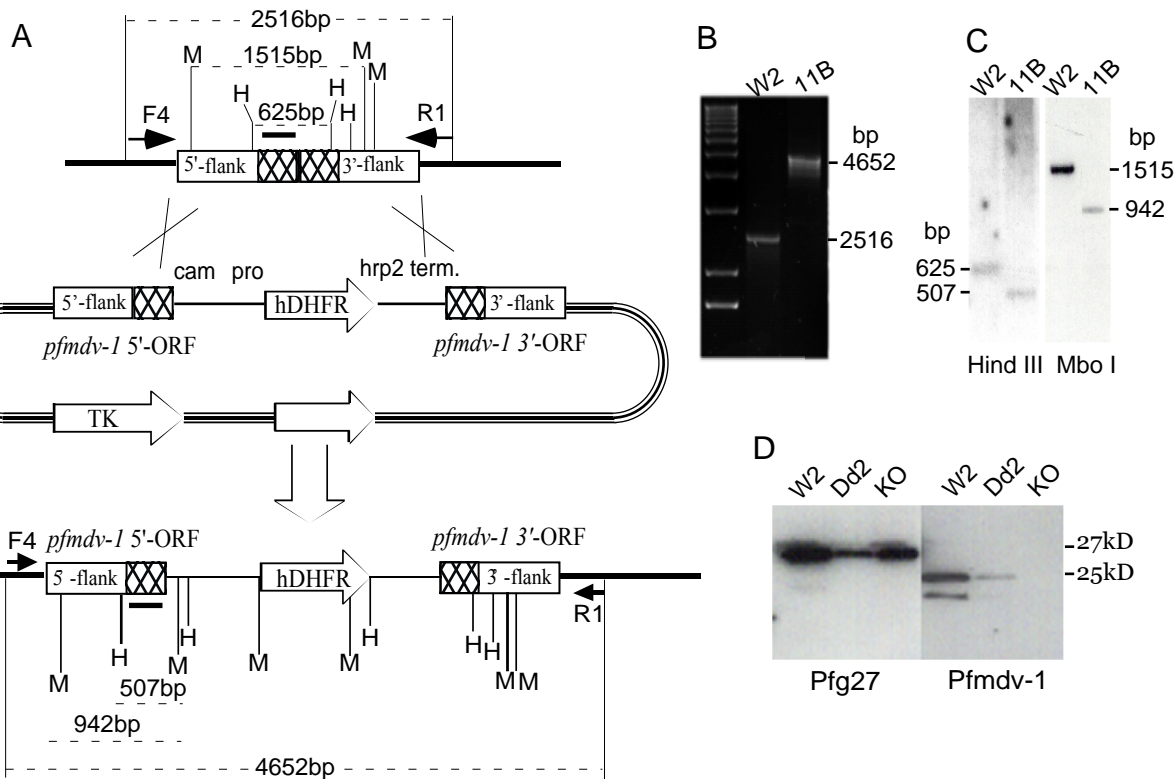

Supplement: pnas_0501858102_1.pdf [file pnas_0501858102_1.pdf]

**A**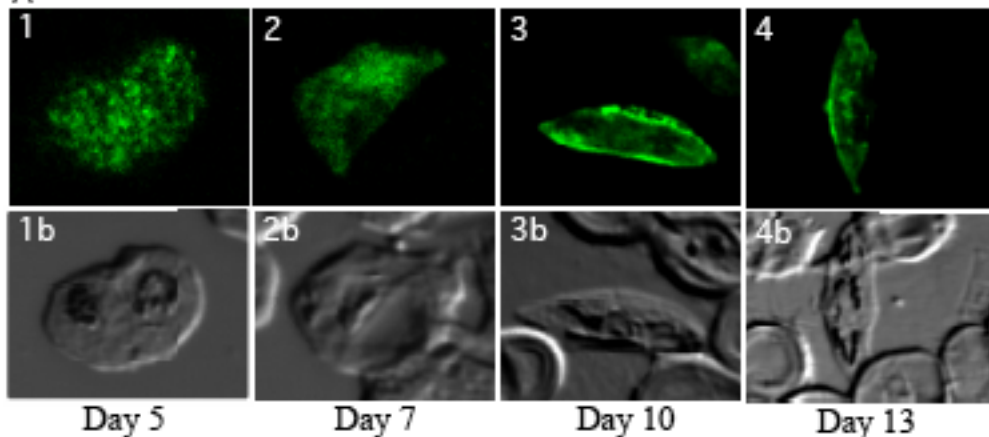**B**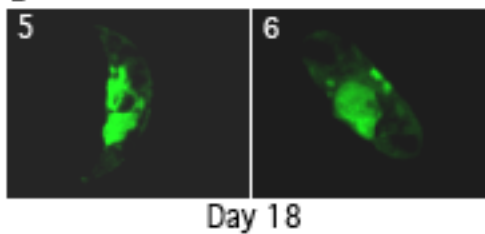**C**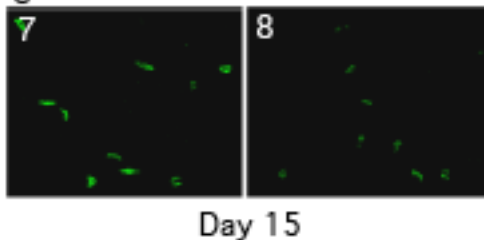**D**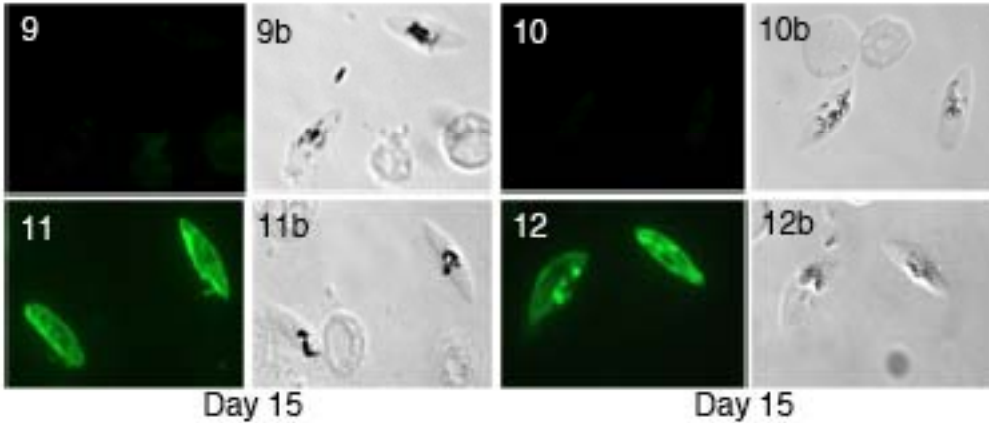

Supplement: pnas_0501858102_3.pdf [file pnas_0501858102_3.pdf]
